# Supplementary material for: Construction of a three-dimensional S,N co-doped ZIF-67 derivative assisted by PEDOT nanowires and its application in rechargeable Zn–air batteries
Source: Royal Society of Chemistry journal article supplement (doi:10.1039/d1nj03900h), 2021-01-01
Supplement: d1nj03900h1.pdf [file d1nj03900h1.pdf]

## Supplementary Information

### Construction of three dimensional S, N co-doped ZIF-67 derivative assisted by PEDOT nanowires and its application in rechargeable Zn-air batteries

Wenjuan Xiang<sup>1,2</sup>, Jing Li<sup>2</sup>, Jinfu Ma<sup>2,3\*</sup>, Zhilin Sheng<sup>2,3</sup>, Hui Lu<sup>2,3</sup> and Shaolin Yang<sup>2,3</sup>

<sup>1</sup>Chemical Science and Engineering College, North Minzu University, Yinchuan, 750021, China

<sup>2</sup>School of Materials Science and Engineering, North Minzu University, Yinchuan, 750021, China

<sup>3</sup>Ningxia Research Center of Silicon Target and Silicon-Carbon Negative Materials Engineering Technology, Yinchuan, 750021, China

### Supplementary Figures

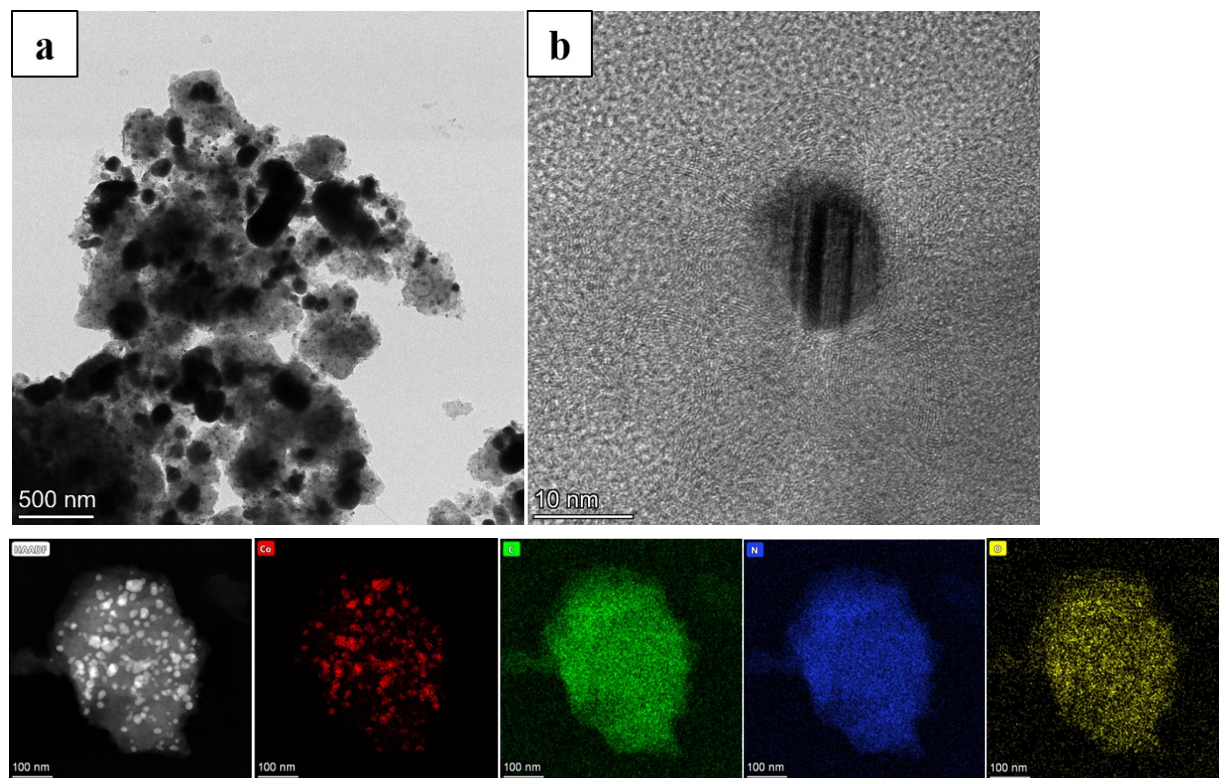

**Fig. S1.** TEM images (a, b) and elemental color mapping of the Co/C@N sample.

\* Corresponding author. E-mail address: ma\_jinfu@nun.edu.cn (J. Ma).

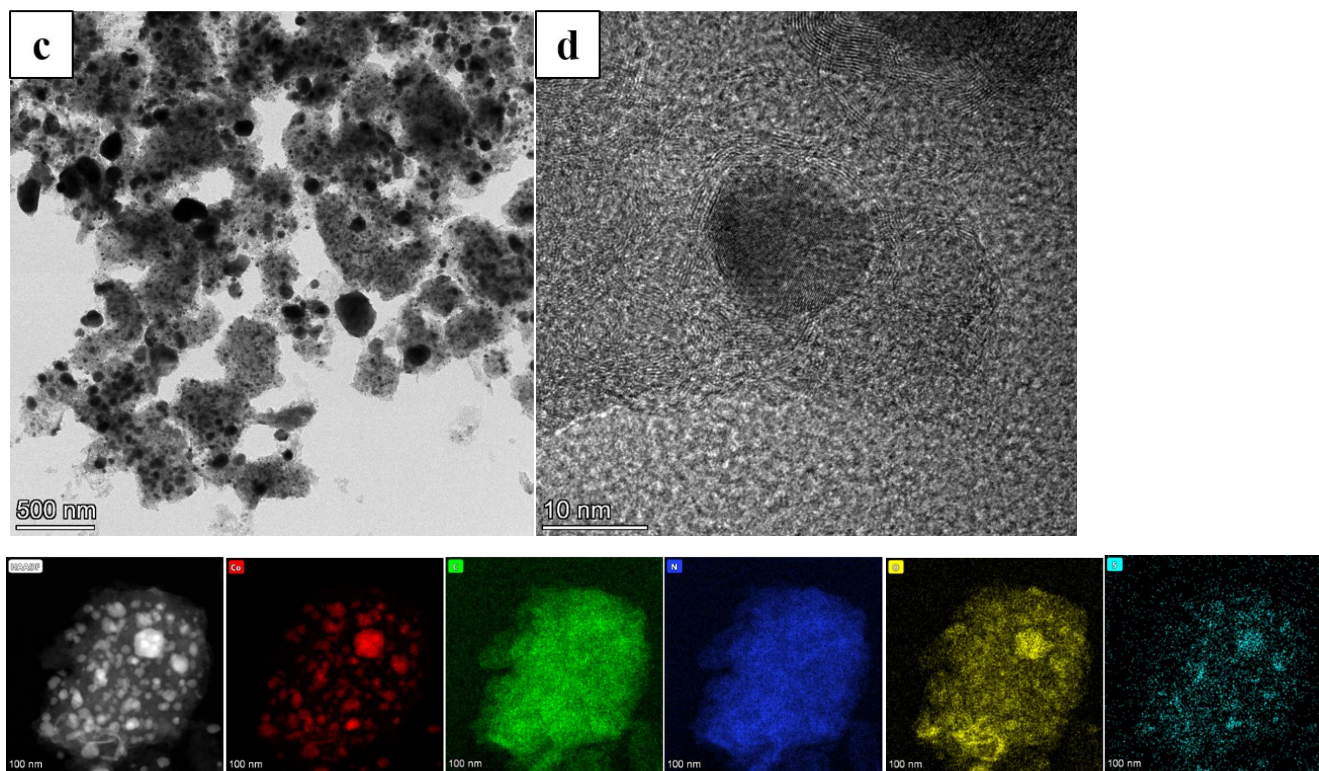

**Fig. S2.** TEM images (c, d) and elemental color mapping of the Co/C@NS sample.

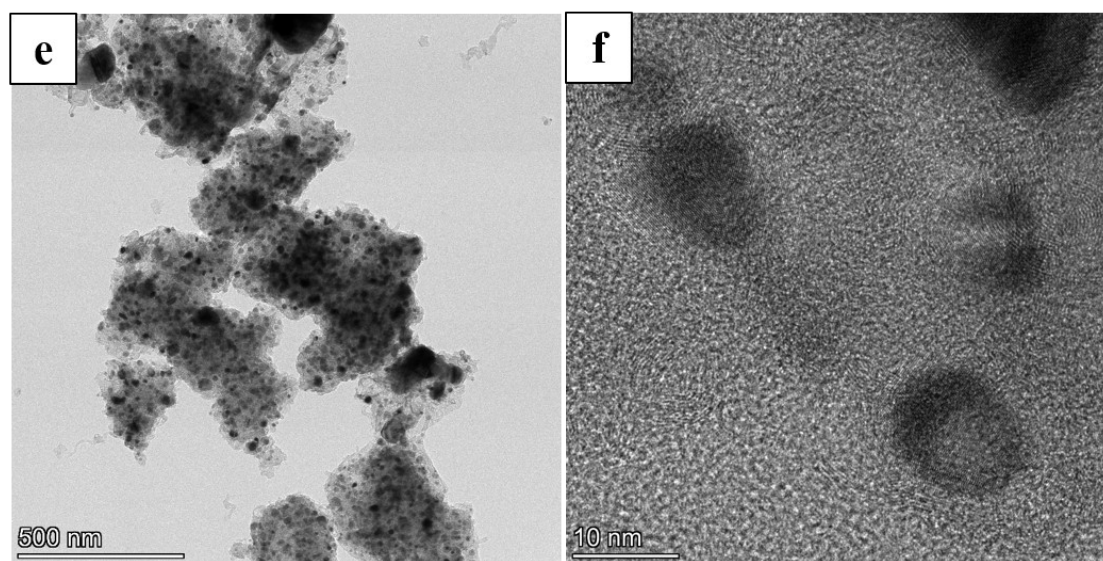

**Fig. S3.** TEM images for Co/C@NS NWs (e, f) catalysts.

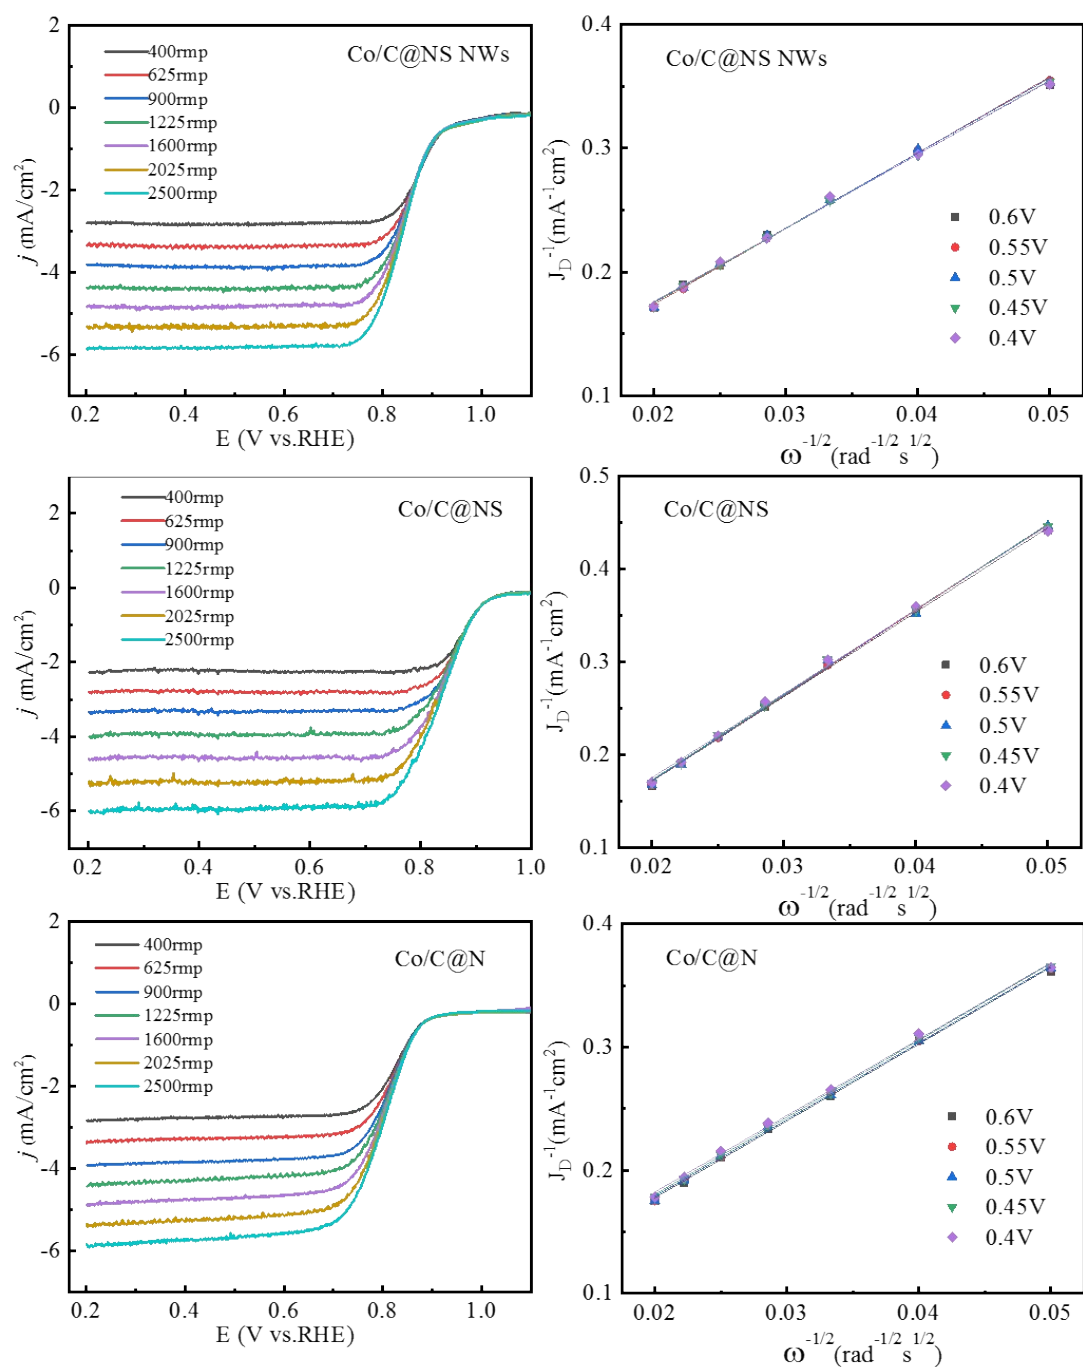

**Fig. S4.** RRDE curves of various catalysts at different rotation rates from 400 to 2500 rpm and the corresponding Koutecky-Levich (K-L) plots ( $j^{-1}$  vs.  $\omega^{-1/2}$ ) of various catalysts between 0.40 V and 0.60 V.



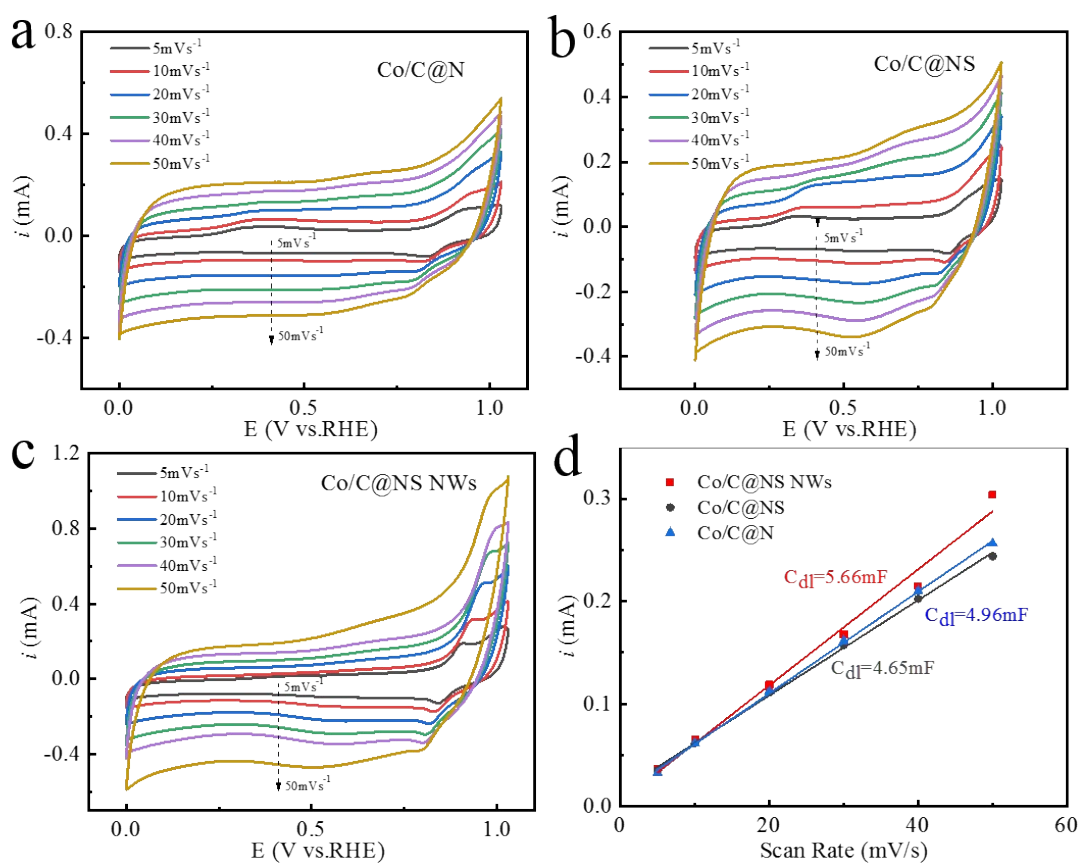

**Fig. S5.** (a - c) CV graphs of various catalysts measured at different scan rate from 5 to 50  $\text{mV s}^{-1}$ . (d) Plots of the current versus the scan rate for Co/ C@N, Co/ C@NS and Co/ C@NS NWs.

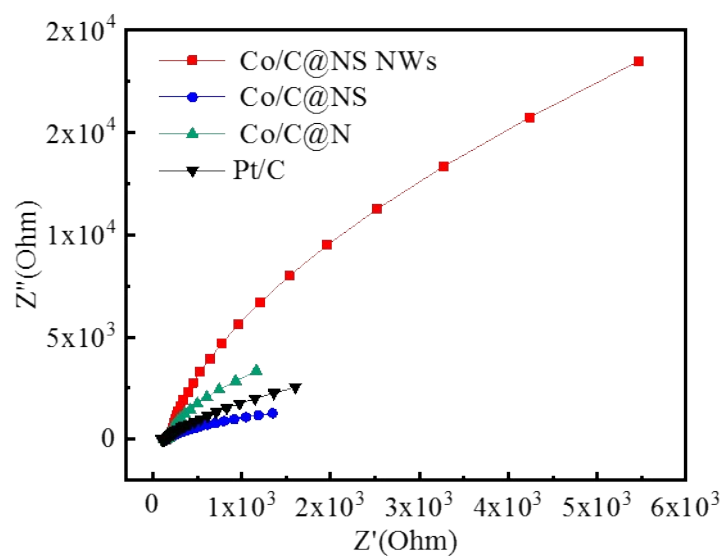

**Fig. S6.** EIS of various catalysts measured.

## Supplementary table

**Table S1.** Comparison of the ORR/OER catalytic performances of Co/C@NS NWs with those of other reported works about ZIF-derived catalysts.

| Sample                     | ORR                            |                       |                              | electron transfer number (n) | OER                              | Ref.             |
|----------------------------|--------------------------------|-----------------------|------------------------------|------------------------------|----------------------------------|------------------|
|                            | $E_{\text{onset}}$ vs. RHE (V) | $E_{1/2}$ vs. RHE (V) | $J_L$ (mA cm <sup>-2</sup> ) |                              | E (V) (J=10mA cm <sup>-2</sup> ) |                  |
| <b>Co/ C@NS NWs</b>        | <b>0.88</b>                    | <b>0.80</b>           | <b>-4.8</b>                  | <b>3.86~3.94</b>             | <b>1.4</b>                       | <b>this work</b> |
| <b>Co/ C@NS</b>            | 0.87                           | 0.81                  | -4.5                         | 3.92-3.99                    | 1.44                             | this work        |
| <b>Co/ C@N</b>             | 0.86                           | 0.79                  | -4.3                         | 3.9-3.99                     | 1.5                              | this work        |
| <b>Pt/C</b>                | 0.92                           | 0.81                  | -6                           | 3.94-3.99                    | 1.81                             | this work        |
| <b>Ag NWs-ZIF67</b>        | 0.903                          | 0.852                 | -                            | 3.85                         | 1.546                            | 1                |
| <b>ZIF-67</b>              | 0.75                           | 0.66                  | 4.32                         | 3.87                         | 1.68                             | 2                |
| <b>Zn-Co-ZIF/GO-920</b>    | 0.914                          | 0.807                 | 6.23                         | 3.97-4.0                     | -                                | 3                |
| <b>ZIF-67@NPC-2(2:1)</b>   | 0.890                          | 0.82                  | -4.94                        | 4.03                         | 1.64                             | 2                |
| <b>Co<sub>3</sub>N-PCL</b> | 0.863                          | 0.822–0.846           | 4.64–5.22                    | 3.97                         | -                                | 4                |
| <b>P/Ni/Co/NC</b>          | 0.872                          | 0.775                 | 5.02                         | -                            | -                                | 5                |
| <b>Co-CNT</b>              | 0.957                          | 0.877                 | 5.20                         | 3.9                          | -                                | 6                |
| <b>CS-HPCN1000-5</b>       | 0.897                          | 0.697                 | -3.75                        | 3.9-4.0                      | -                                | 7                |
| <b>CNT-900</b>             | 0.934                          | 0.819                 | 4.98                         | 3.99                         | -                                | 8                |

**Table S2.** The performance of liquid rechargeable Zn-air batteries with various bifunctional electrocatalysts.

| Sample                                    | Open circuit potential (V) | Peak power density (mW.cm <sup>-2</sup> ) | Specific capacity at current density@J (mAh.g <sup>-1</sup> ) | Electrolyte                      | Oxygen source | Ref.             |
|-------------------------------------------|----------------------------|-------------------------------------------|---------------------------------------------------------------|----------------------------------|---------------|------------------|
| Co/C@NS NWs                               | 1.46                       | 129.3                                     | 800@10                                                        | 6 M KOH                          | air           | <b>This work</b> |
| Co <sub>3</sub> O <sub>4</sub> -x/NG      | 1.49                       | 166                                       | 700.6@10                                                      | 6 M KOH                          | air           | 9                |
| Co-NCNT/Ng-900                            | 1.4                        | 174.4                                     | 795.0@10                                                      | 6 M KOH                          | air           | 9                |
| CoDNG900                                  | 1.45                       | 207.47                                    | 669 @10                                                       | 6 M KOH                          | air           | 9                |
| FeCo-N-C-700                              | 1.39                       | 150                                       | 518@10                                                        | 6 M KOH                          | air           | 9                |
| Co@hNCTs-800                              | 1.45                       | 149                                       | 746 @10                                                       | 6 M KOH                          | air           | 9                |
| NiCo <sub>2.148</sub> O <sub>4</sub> PNSs | 1.46                       | 83                                        | 700@10                                                        | 6 M KOH                          | air           | 9                |
| Co <sub>4</sub> N@NC-2                    | 1.48                       | 74.3                                      | 769.4@5                                                       | 6 M KOH                          | air           | 9                |
| 1-Pd/Co(OH) <sub>2</sub>                  | 1.4                        | -                                         | 766@10                                                        | 6 M KOH                          | air           | 9                |
| CoNC (1:4)                                | 1.33                       | 126                                       | 852@10                                                        | 6 M KOH                          | air           | 9                |
| Co-MOF-800                                | 1.38                       | 144                                       | 671.6@10                                                      | 6 M KOH                          | air           | 9                |
| Co-MOF/LC-0.5 + 20Pt/C                    | 1.44                       | 126                                       | -                                                             | 6 M KOH+0.2M ZnCl <sub>2</sub>   | air           | 10               |
| MnO@Co-N/C                                | -                          | 130.3                                     | -                                                             | 6M KOH+0.2 M Zn(Ac) <sub>2</sub> | air           | 11               |
| SNC                                       | 1.24                       | 94.8                                      | -                                                             | Alkaline electrolyte             | air           | 12               |

## Reference

1. Y. Wang, M. Zhao, Q. Zhao, Q. Li, H. Pang, Facile synthesis of silver nanowire-zeolitic imidazolate framework 67 composites as high-performance bifunctional oxygen catalysts. *Nanoscale* **2018**, *10* (33), 15755-15762.
2. H. Wang, F. X. Yin, B. H. Chen, X. B. He, P. L. Lv, C. Y. Ye, D. J. Liu, ZIF-67 incorporated with carbon derived from pomelo peels: A highly efficient bifunctional catalyst for oxygen reduction/evolution reactions. *Appl. Catal. B-Environ.* **2017**, *205*, 55-67.
3. Z. Zhu, C. Chen, M. Cai, Y. Cai, H. Ju, S. Hu, M. Zhang, Porous Co-N-C ORR catalysts of high performance synthesized with ZIF-67 templates. *Mater. Res. Bull.* **2019**, *114*, 161-169.
4. H. Park, S. Oh, S. Lee, S. Choi, M. Oh, Cobalt- and nitrogen-codoped porous carbon catalyst made from core-shell type hybrid metal-organic framework (ZIF-L@ZIF-67) and its efficient oxygen reduction reaction (ORR) activity. *Appl. Catal B-Environ* **2019**, *246*, 322-329.
5. L. Li, W. Xie, J. Chen, J. Yang, ZIF-67 derived P/Ni/Co/NC nanoparticles as highly efficient electrocatalyst for oxygen reduction reaction (ORR). *J. Solid State Electrochem.* **2018**, *264*, 1-5.
6. M. Wang, C. Ye, M. Wang, T. Li, Y. Yu, S. Bao, Synthesis of M (Fe<sub>3</sub>C, Co, Ni)-porous carbon frameworks as high-efficient ORR catalysts. *Energy Storage Mater.* **2018**, *11*, 112-117.
7. P. Cao, Y. Liu, X. Quan, J. Zhao, S. Chen, H. Yu, Nitrogen-doped hierarchically porous carbon nanopolyhedras derived from core-shell ZIF-8@ZIF-8 single crystals for enhanced oxygen reduction reaction. *Catal. Today* **2019**, *327*, 366-373.
8. H. Huang, Y. Li, N. Wang, S. Chen, C. Wang, T. Ma, Efficient oxygen reduction reaction catalyst derived from ZnO@ zeolite imidazolate framework nanowire composite. *Inorg Chem. Commun* **2019**, *101*, 23-26.
9. D. Zhou, H. Fu, J. Long, K. Shen, X. Gou, Novel fusiform core-shell-MOF derived intact metal@carbon composite: An efficient cathode catalyst for aqueous and solid-

state Zn-air batteries. *Journal of Energy Chemistry* **2022**, *64*, 385-394.

10. X. Wang, L. Ge, Q. Lu, J. Dai, D. Guan, R. Ran, S.-C. Weng, Z. Hu, W. Zhou, Z. Shao, High-performance metal-organic framework-perovskite hybrid as an important component of the air-electrode for rechargeable Zn-Air battery. *Journal of Power Sources* **2020**, *468*.

11. Y.-N. Chen, Y. Guo, H. Cui, Z. Xie, X. Zhang, J. Wei, Z. Zhou, Bifunctional electrocatalysts of MOF-derived Co-N/C on bamboo-like MnO nanowires for high-performance liquid- and solid-state Zn-air batteries. *Journal of Materials Chemistry A* **2018**, *6* (20), 9716-9722.

12. Y. Guo, S. Yao, L. Gao, A. Chen, M. Jiao, H. Cui, Z. Zhou, Boosting bifunctional electrocatalytic activity in S and N co-doped carbon nanosheets for high-efficiency Zn-air batteries. *Journal of Materials Chemistry A* **2020**, *8* (8), 4386-4395.
